# Supplementary material for: Doxorubicin-loaded redox-responsive amphiphilic dendritic porphyrin conjugates for chemotherapy and photodynamic therapy
Source: Royal Society of Chemistry journal article supplement (doi:10.1039/c6ra09356f), 2016-01-01
Supplement: c6ra09356f1.pdf [file c6ra09356f1.pdf]

## Supporting Information

# **Doxorubicin-loaded Redox-Responsive Amphiphilic Dendritic Porphyrin Conjugates for Chemotherapy and Photodynamic Therapy**

Feng Liu, Yang Zhang, Xiuwei Pan, Lei Xu, Yudong Xue, Weian Zhang\*

*Shanghai Key Laboratory of Functional Materials Chemistry, East China  
University of Science and Technology, 130 Meilong Road, Shanghai 200237, P.  
R. China*

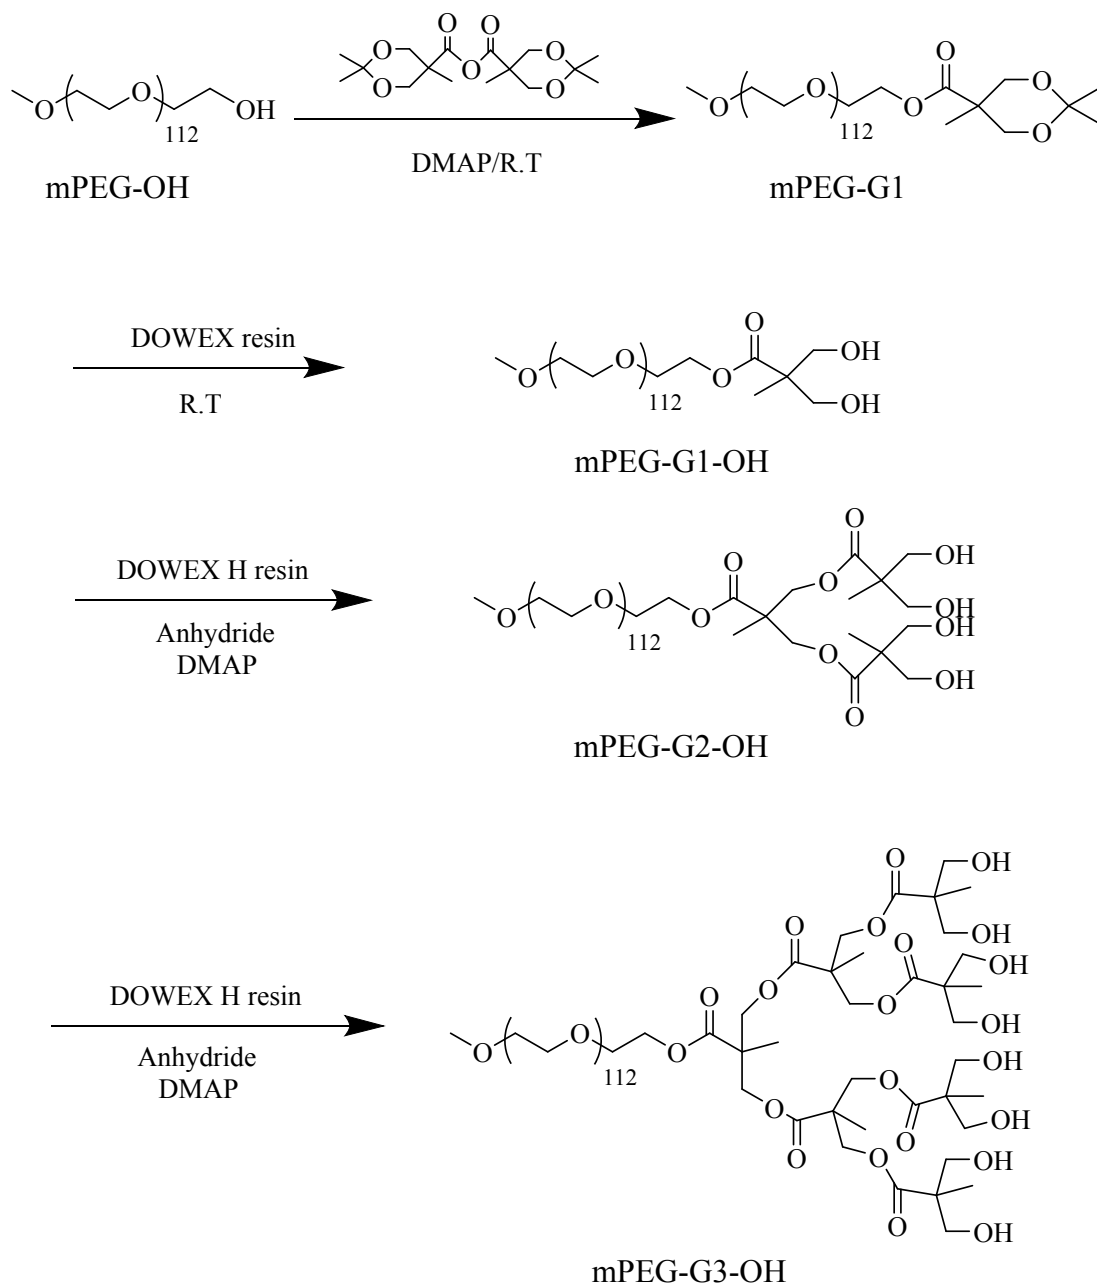

**Scheme S1** Synthesis of the mPEG-G3-OH.

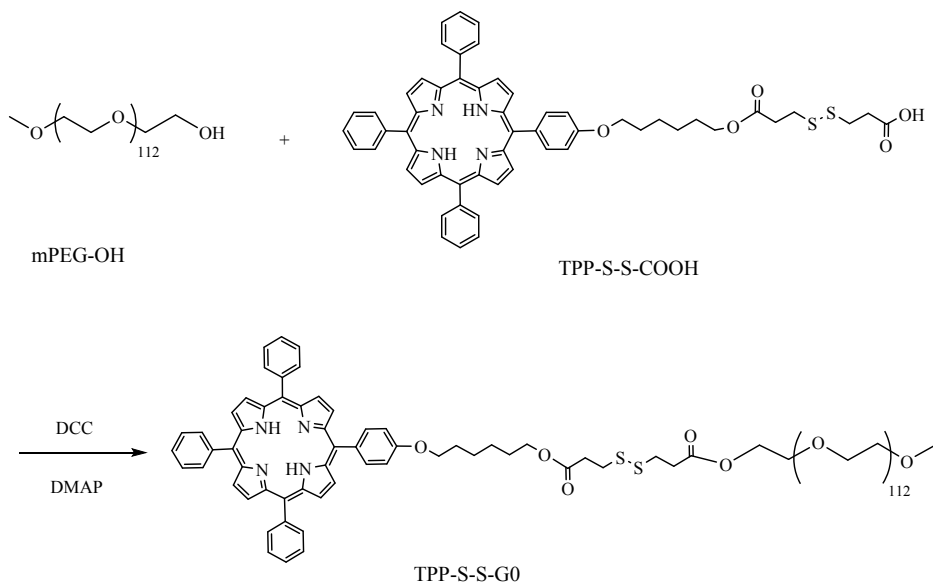

**Scheme S2** Synthesis of the TPP-S-S-G0.

### Synthesis of First-Generation Dendronized PEG (PEG-G1 dendron)

PEG (5 g, 1 mmol), 1 g anhydride (3 mmol) and 0.34 g DMAP (3 mmol) were dissolved in 30 mL of  $\text{CH}_2\text{Cl}_2$  and stirred at room temperature for 24 h. 3 mL methanol was added for 24 h. The flask was opened and the product filtered off and precipitated in diethyl ether. The precipitate was dried under vacuum at room temperature for 24 h to obtain PEG-G1 dendron.  $^1\text{H-NMR}$  (500 MHz,  $\text{CDCl}_3$ ),  $\delta$  ppm: 3.38 (s, 3H), 3.65 (t, 452H), 4.28-4.32 (m, 2H), 1.21 (s, 3H), 4.17-4.22 (m, 2H), 1.38 (s, 3H), 1.43 (s, 3H).

### Synthesis of PEG-G1-OH

PEG-G1 dendron (5 g) was dissolved in 125 mL of methanol. After one teaspoon of Dowex  $\text{H}^+$  resin was added, the reaction mixture was stirred for 24 h at room temperature. Once the reaction was complete, the Dowex  $\text{H}^+$  resin was filtered off and washed with methanol. The methanol solution was condensed to about 10 mL and precipitated in 50 mL of diethyl ether to give the product as a reddish solid.  $^1\text{H-NMR}$  (500 MHz,  $\text{CDCl}_3$ ),  $\delta$  ppm: 3.38 (s, 3H), 3.45-3.85 (m, 452H), 4.32-4.36 (m, 2H), 1.13 (d, 3H).

### Synthesis of PEG-G2-OH and PEG-G3-OH

With the same method as described in the two preceding subsections, PEG-G2-OH, PEG-G3-OH were separately prepared as shown in **Scheme S1**. The product of each generation was also a white solid, and the yields were all above 85%. <sup>1</sup>H-NMR (500 MHz, CDCl<sub>3</sub>), δ ppm: PEG-G2: 3.38 (s, 3H) , 3.55-3.75 (m, 452H), 4.27 (t, 2H) , 1.27 (s, 3H), 4.14 (t, 2H), 4.31 (t, 4H), 1.14 (s, 6H), 1.35 (s, 6H), 1.41 (s, 6H); PEG-G2-OH: 3.38 (s, 3H), 3.45-3.75 (m, 452H), 4.41 (t, 2H), 1.32 (s, 3H), 4.32 (t, 2H), 1.08 (s, 6H); PEG-G3: 3.38 (s, 3H), 3.45~3.85 (m, 452H), 4.25-4.33 (m, 8H), 1.28 (s, 9H), 4.15 (s, 8H), 1.15 (s, 12H), 1.35 (s, 12H), 1.42 (s, 12H); PEG-G3-OH: 3.38 (s, 3H), 3.45-3.85 (m, 452H), 4.27-4.37 (m, 8H), 1.28-1.38 (m, 9H), 1.04-1.11 (s, 12H).

### Synthesis of Disulfide-Modified Carboxyl Terminal Porphyrin (TPP-S-S-COOH)

A representative example for the synthesis of TPP-S-S-COOH is as follows: TPPC6-OH (0.67 g, 1 mmol), 3, 3'-dithiodipropionic acid (0.42 g, 2 mmol) and DMAP (0.12 g, 1 mmol) were dissolved in 30 mL of anhydrous DMF under Argon, and DCC (0.41 g, 2 mmol) in DMF (5 mL) was added drop-wise into the mixture in an ice-water bath. Then the mixture was washed with saturated sodium chloride solution, dried with MgSO<sub>4</sub> and filtered. After removing DCM by evaporation, the crude product was purified on a silica gel column with petroleum ether/ethyl acetate (3 : 2, v/v) as the eluent. <sup>1</sup>H-NMR (400 MHz, CDCl<sub>3</sub>), δ ppm: PEG-G2: 8.87 (m, 8H), 8.21 (m, 6H), 8.11 (m, 2H), 7.75 (m, 9H), 7.26 (m, 2H), 4.26 (t, 2H), 4.20 (t, 2H), 2.96 (m, 4H), 2.76 (m, 4H), 1.99 (m, 2H), 1.80-1.69 (m, 6H), -2.77 (s, 2H).

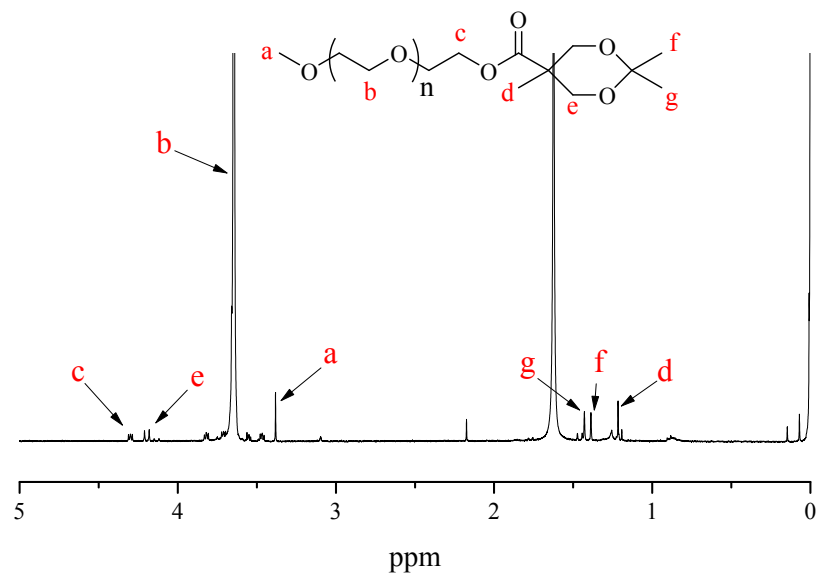

**Fig. S1** <sup>1</sup>H-NMR spectrum of PEG-G1 in CDCl<sub>3</sub>.

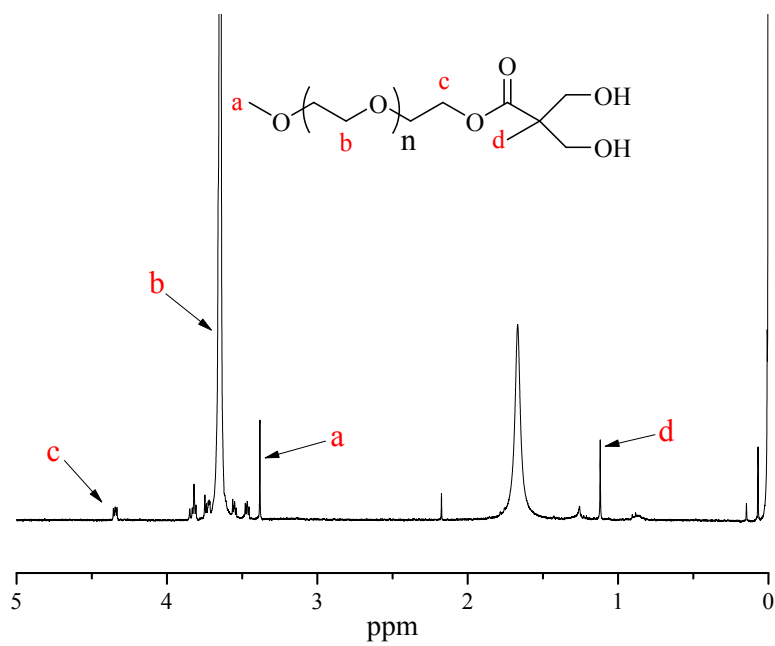

**Fig. S2** <sup>1</sup>H-NMR spectrum of PEG-G1-OH in CDCl<sub>3</sub>.

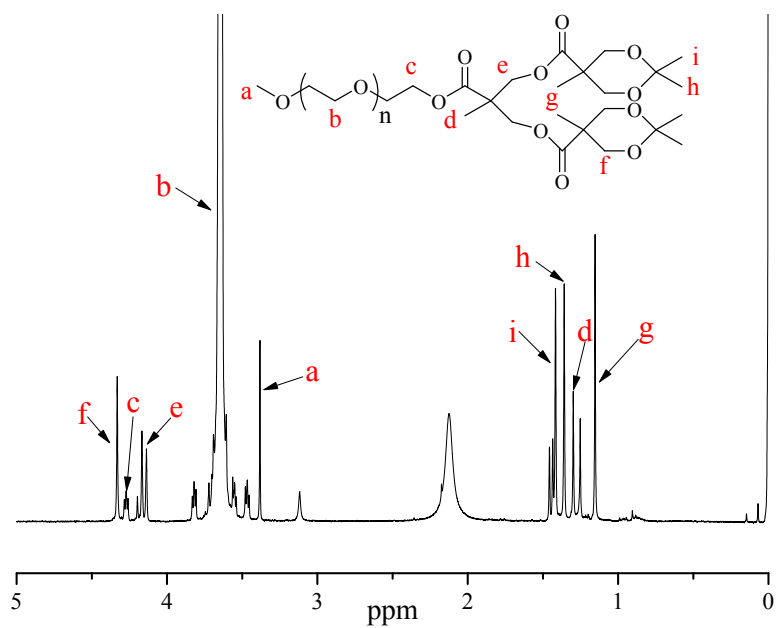

**Fig. S3** <sup>1</sup>H-NMR spectrum of PEG-G2 in CDCl<sub>3</sub>.

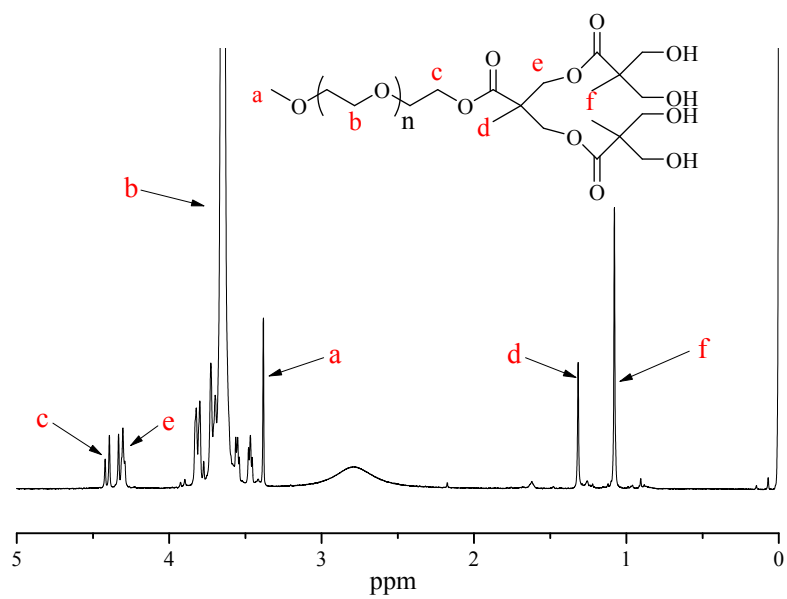

**Fig. S4** <sup>1</sup>H-NMR spectrum of PEG-G2-OH in CDCl<sub>3</sub>.

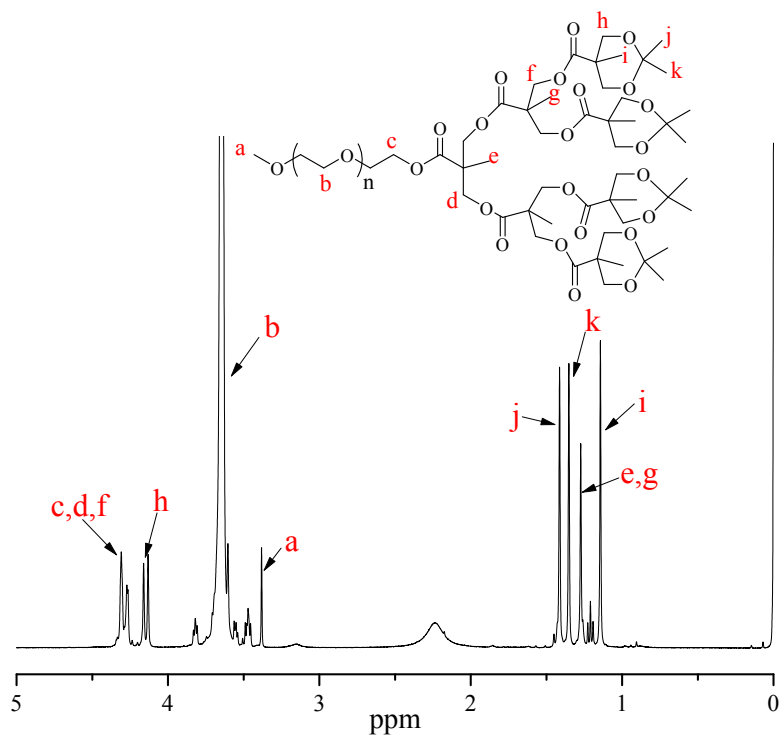

**Fig. S5** <sup>1</sup>H-NMR spectrum of PEG-G3 in CDCl<sub>3</sub>.

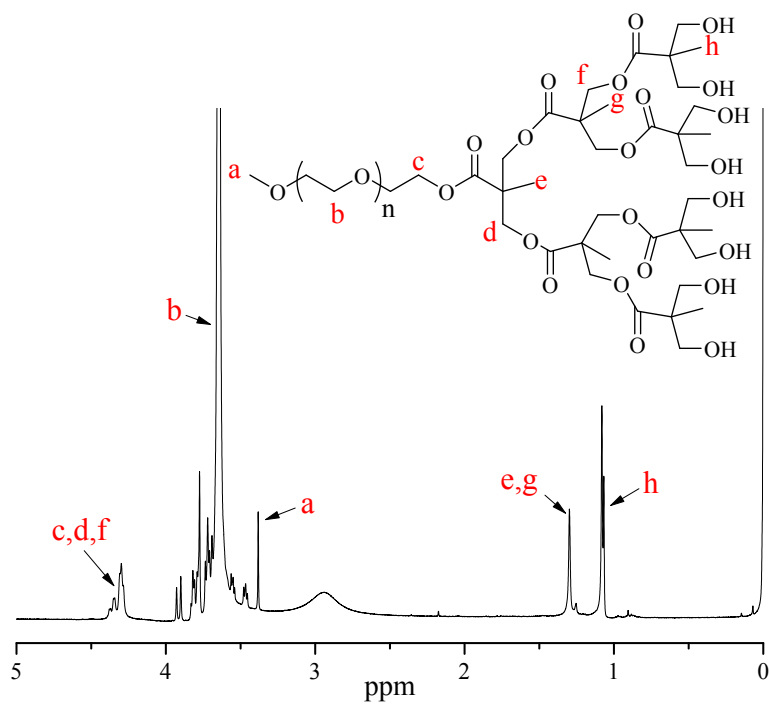

**Fig. S6** <sup>1</sup>H-NMR spectrum of PEG-G3-OH in CDCl<sub>3</sub>.

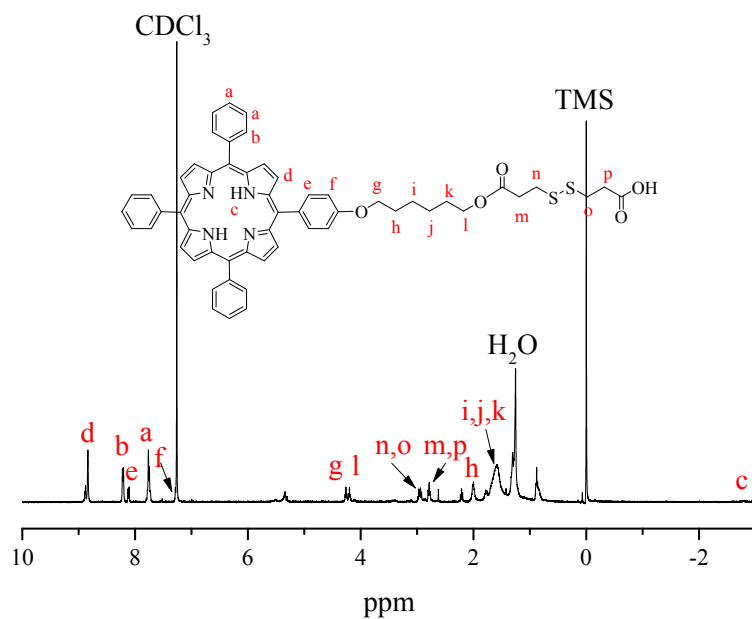

**Fig. S7** <sup>1</sup>H-NMR spectrum of TPP-S-S-COOH in CDCl<sub>3</sub>.

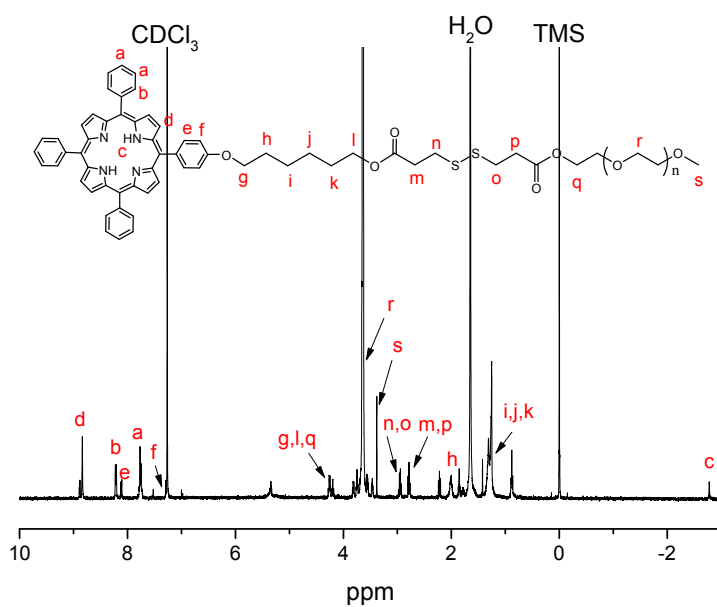

**Fig. S8** <sup>1</sup>H-NMR spectrum of TPP-S-S-G0 in CDCl<sub>3</sub>.



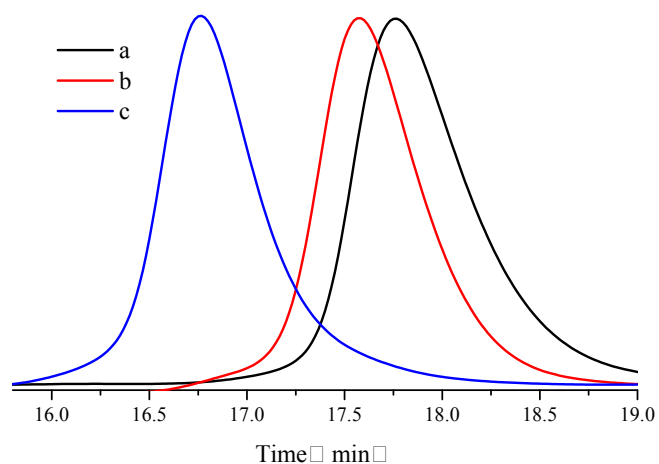

**Fig. S9** GPC curves of (a) PEG, (b) TPP-S-S-G0 and (c) TPP-S-S-G3.

**Table S1** Characterization of PEG and TPP-S-S-Gn (n = 0, 3) Copolymers

| Samples    | $M_n^a$<br>(g mol <sup>-1</sup> ) | $M_n^b$<br>(g mol <sup>-1</sup> ) | PDI <sup>b</sup> |
|------------|-----------------------------------|-----------------------------------|------------------|
| PEG        | 5 000                             | 4 871                             | 1.05             |
| TPP-S-S-G0 | 5 905                             | 5 637                             | 1.03             |
| TPP-S-S-G3 | 13 053                            | 8 870                             | 1.03             |

<sup>a</sup>Determined by the <sup>1</sup>H-NMR results,

<sup>b</sup>Number-average weight and molecular weight distribution (PDI) were evaluated by GPC.

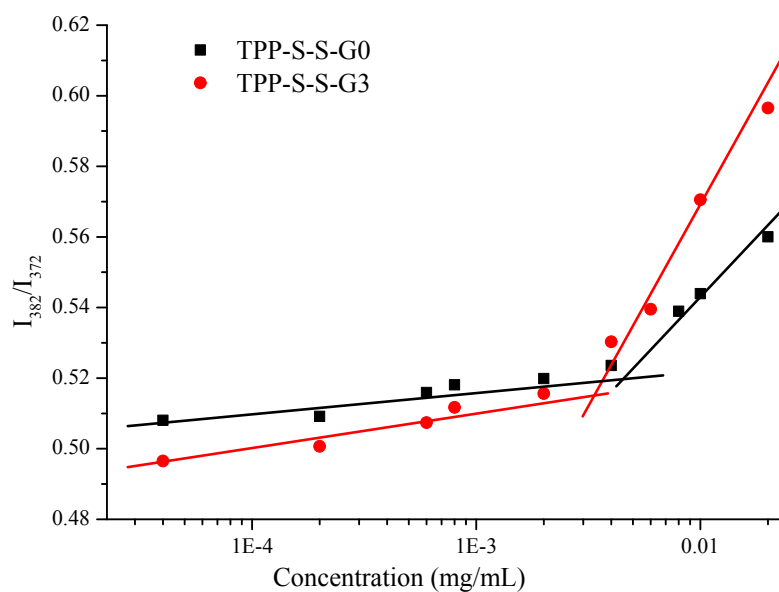

**Fig. S10** The CMC values of TPP-S-S-Gn (n = 0, 3) determined from the plot of fluorescence intensity ratio  $I_{382}/I_{372}$  of pyrene as a function of their concentrations.

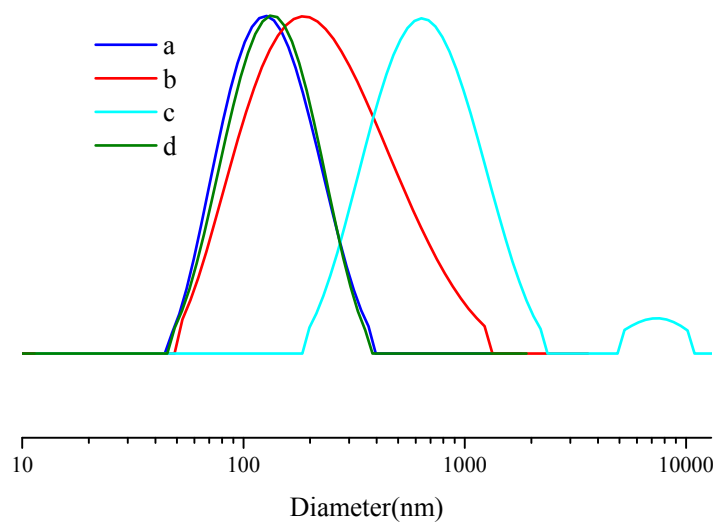

**Fig. S11** Size distribution of TPP-S-S-G3 micelles (a), TPP-S-S-G3 micelles treated with 10 mM of GSH for 4 h (b) and 24 h (c), and without GSH for 24 h (d).

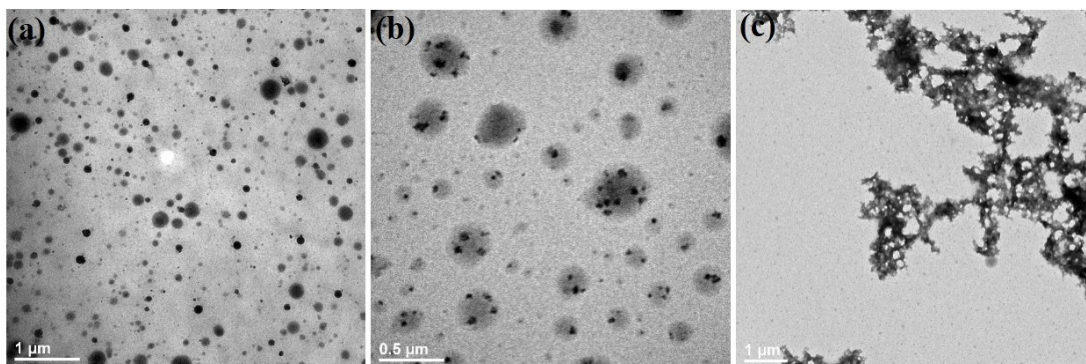

**Fig. S12** TEM images of TPP-S-S-G0 micelles with treatment using GSH at different times; GSH for 0 h (a), GSH for 4 h (b), and GSH for 24 h (c).

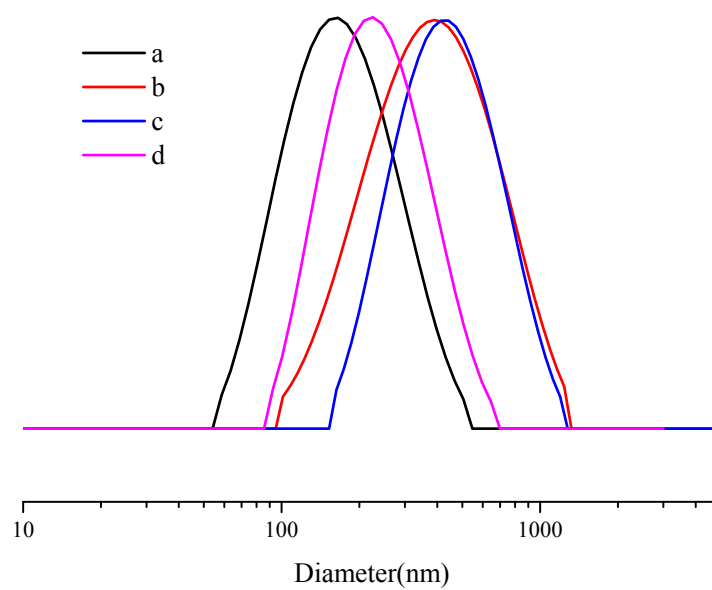

**Fig. S13** Size distribution of TPP-S-S-G0 micelles (a), TPP-S-S-G0 micelles treated with 10 mM of GSH for 4 h (b) and 24 h (c), and without GSH for 24 h (d).

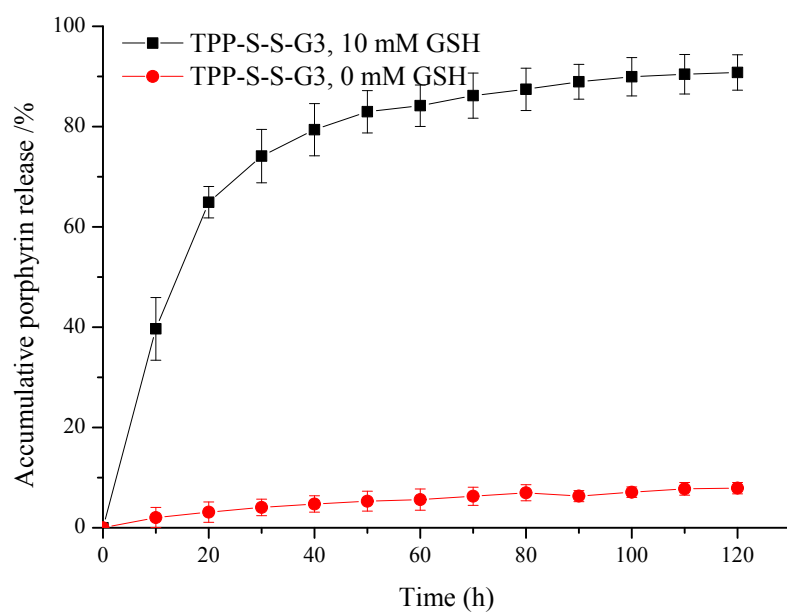

**Fig. S14** Reduction-release of porphyrin from TPP-S-S-G0 micelles treated with 10 mM GSH and without GSH.

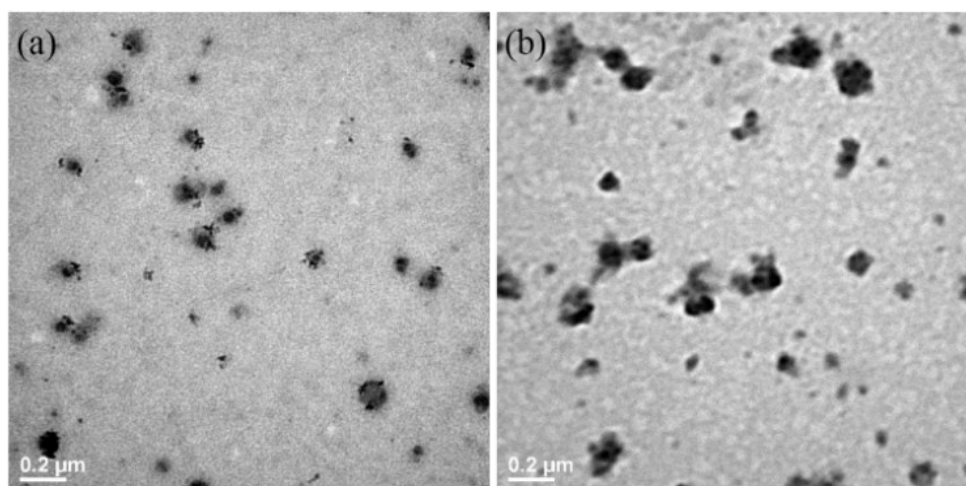

**Fig. S15** TEM images of DOX-loaded TPP-S-S-G3 micelles (a) and DOX-loaded TPP-S-S-G0 micelles (b).

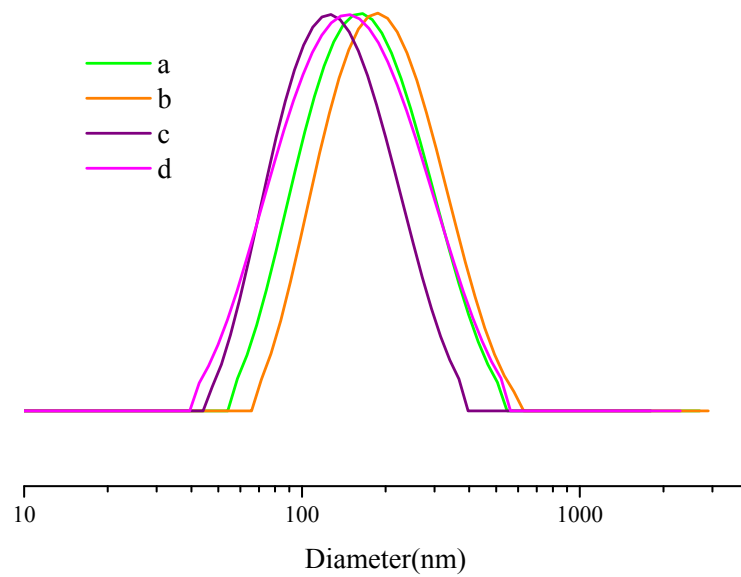

**Fig. S16** Size distribution of TPP-S-S-G0 micelles (a), DOX-loaded TPP-S-S-G0 micelles (b), TPP-S-S-G3 micelles (c), and DOX-loaded TPP-S-S-G3 micelles (d).

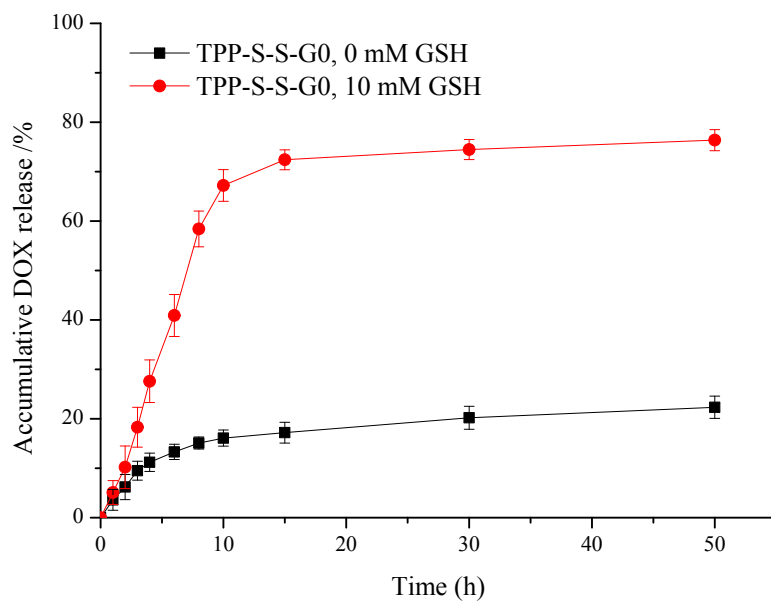

**Fig. S17** Reduction-release of DOX from DOX-loaded TPP-S-S-G0 micelles treated with GSH (10 mM) and without GSH.

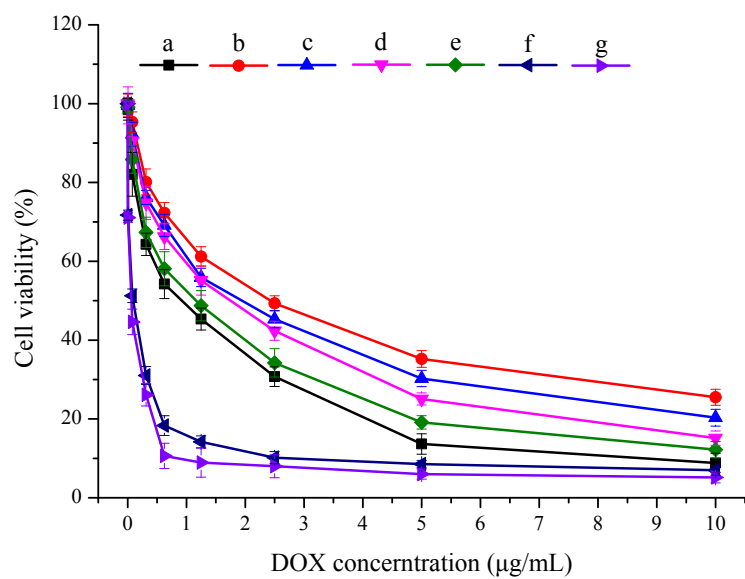

**Fig. S18** Viability of MCF-7 cells cultured with free DOX and DOX-loaded TPP-S-S-Gn (n = 0, 3) micelles at different concentrations. The cells were pretreated with or without 10 mM GSH-OEt. a: DOX-loaded TPP-S-S-G0, b: DOX-loaded TPP-S-S-G3, c: DOX-loaded TPP-S-S-G0 with 10 mM GSH, d: DOX-loaded TPP-S-S-G3 with 10 mM GSH, e: DOX, f: DOX-loaded TPP-S-S-G3 micelles with irradiation, g: DOX-loaded TPP-S-S-G3 micelles with irradiation and 10 mM GSH-OEt.
